# Supplementary material for: Two-dimensional β-phase group-VA binary compounds for versatile electronic and optical properties
Source: Royal Society of Chemistry journal article supplement (doi:10.1039/c8tc03618g), 2018-01-01
Supplement: c8tc03618g1.pdf [file c8tc03618g1.pdf]

## Electronic Supplementary Information

### Two-dimensional $\beta$ -phase group-VA binary compounds for versatile electronic and optical properties

Hui Zhang<sup>a,b</sup>, Mingyang Chen<sup>b\*</sup>

<sup>a</sup>Normal college, Shenyang University, Shenyang 110044, China

<sup>b</sup>Beijing Computational Science Research Center, Beijing 100193, China.

\* Email: mychen@csrc.ac.cn

#### S1. Formation energy

The formation energy of binary monolayers is calculated by  $\Delta E_f = E(AB) - \frac{1}{2}[E(A) + E(B)]$ , where  $E(AB)$  represents the total energy per each atom of binary monolayers, and  $E(A)$  and  $E(B)$  represent those of elemental monolayers.

#### S2. Formation energy

The cohesive energy of binary monolayers is calculated by  $\Delta E_c = E(AB) - \frac{1}{2}[E'(A) + E'(B)]$ , where  $E(AB)$  represents the total energy per each atom of binary monolayers, and  $E'(A)$  and  $E'(B)$  represent those of isolated elemental A and B atoms.

#### S3. Deformation charge density

Deformation charge density of system AB is defined as  $\Delta\rho = \rho_{AB} - \rho_A - \rho_B$ , where  $\rho_{AB}$  is the charge density of monolayer AB and  $\rho_A$  or  $\rho_B$  is the atomic charge density of the A or B atoms in the monolayer AB.

#### S4. carrier effective mass and mobility

The carrier effective masses are calculated by fitting the conventional equation  $E(\mathbf{k}) = E_0 + \hbar^2 \mathbf{k}^2 / 2m^*$ , where  $E_0$  is the band energy at the k-point and  $\mathbf{k}$  is the wave-vector relative to the k-point<sup>1</sup>.

The carrier mobilities ( $\mu$ ) were calculated using the widely used deformation potential (DP) theory,<sup>2</sup> with  $\mu = \frac{e\hbar^3 C_{2D}}{K_B T m_i^* m_d (E_1)^2}$ . Here,  $e$  is the elementary charge,  $\hbar$  the reduced Planck constant,  $K_B$  the Boltzmann constant,  $T$  the temperature,  $m_i^*$  the carrier effective mass along the transport direction,  $m_d$  the average effective mass defined as  $m_d = (m_x^* m_y^*)^{\frac{1}{2}}$ ,  $C_{2D}$  the elastic modulus, and  $E_1$  deformation potential. The  $x$  and  $y$  are the special zigzag and armchair transport directions, as shown in Fig. 1. To obtain the  $C_{2D}$  and  $E_1$ , four strains of  $\delta$  (-1.00%, -0.05%, 0.05% and 1.00%) are applied on the perfect 2D lattice. The elastic modulus  $C_{2D}$  is fitted as per the response of total energy toward the applied strains by  $C_{2D} = 2\Delta E / (\delta^2 S_0)$ , where  $\Delta E$  is the total energy change due to the applied strains and  $S_0$  is the area of the 2D supercell at the equilibrium state. The deformation potential is fitted by  $E_1 = \Delta E_b / \delta$ , where  $\Delta E_b$  is the energy changes of the band edges (the top of valence band for holes and the bottom of the conduction band for electrons) due to the applied strains.

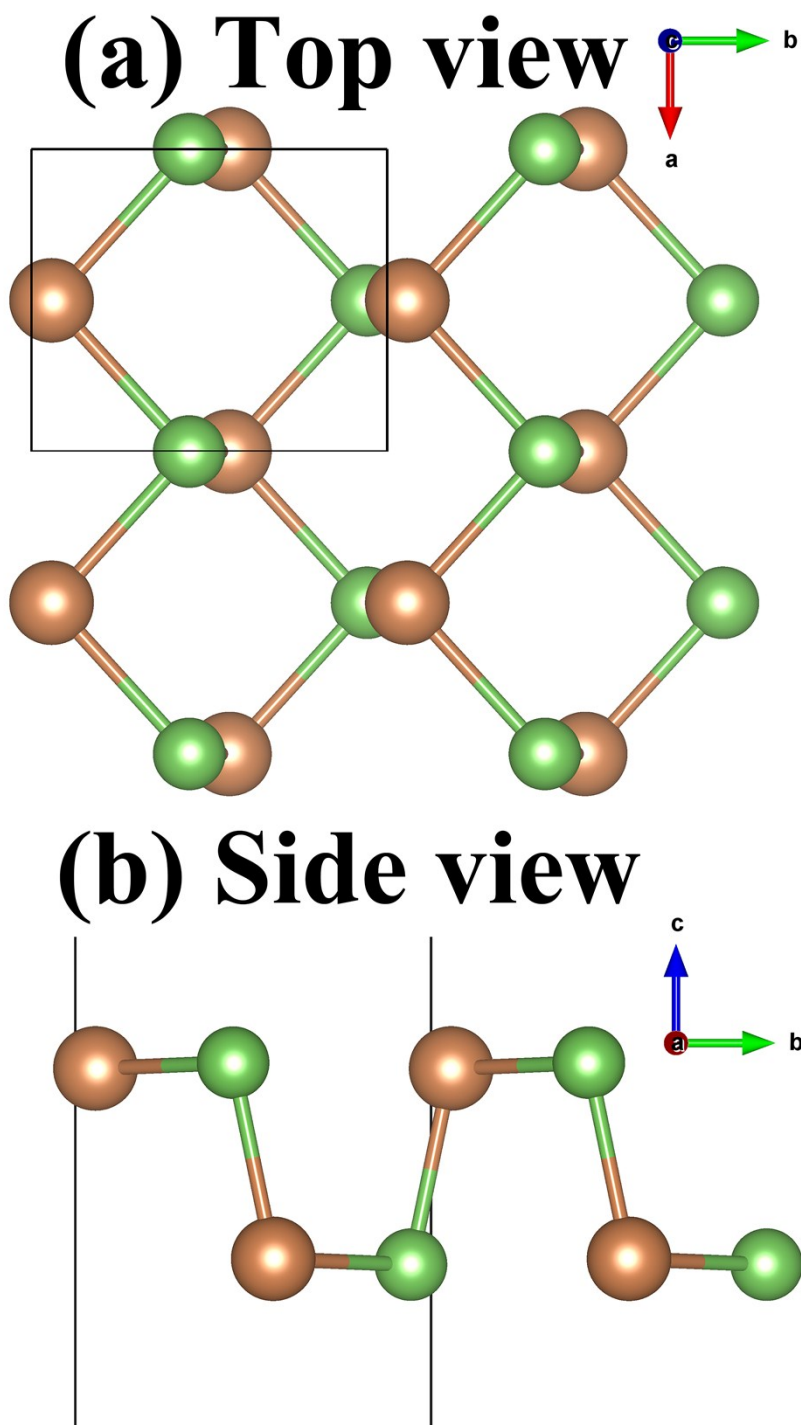

**Fig. S1** (a) Top and (b) side views of atomistic structure of 2D  $\alpha$ -AsSb monolayer. The As and Sb atoms are represented by green and brown balls.

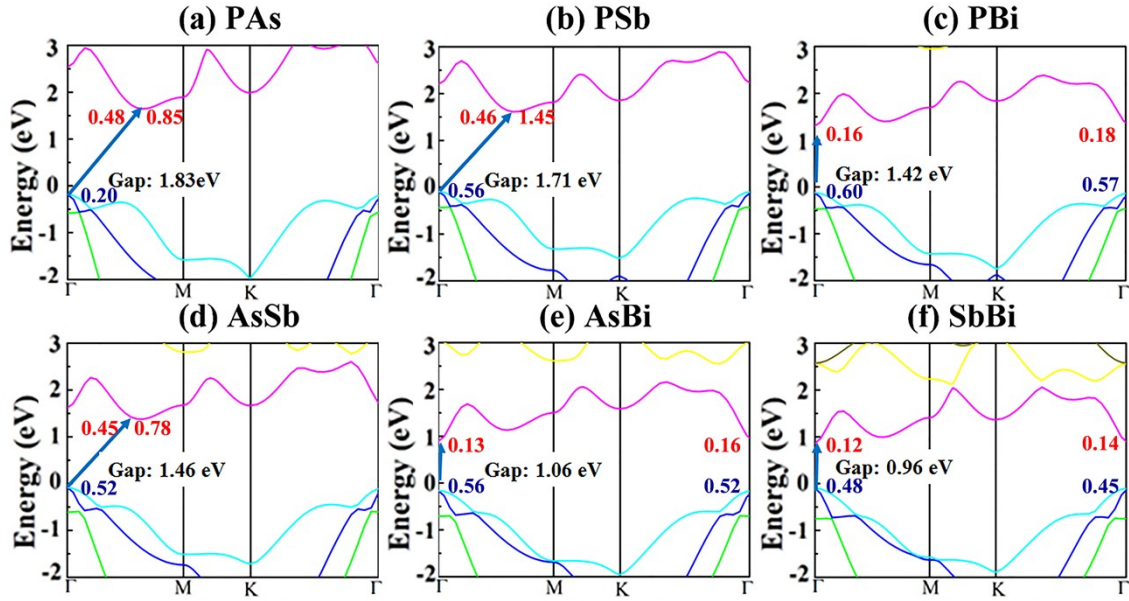

**Fig. S2** Band structures for 2D  $\beta$ -phase binary group-VA monolayers at the PBE level. The electron and hole effective masses for different directions are labeled in red and blue, respectively. The effective masses are given in the unit of the free-electron mass  $m_0$ .

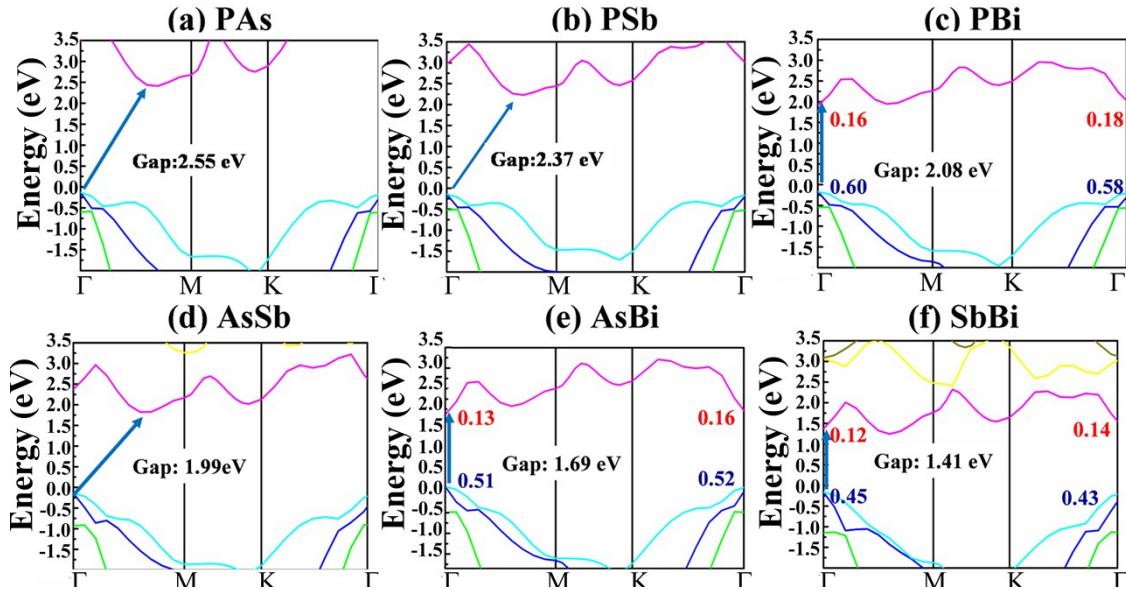

**Fig. S3** Band structures for 2D  $\beta$ -phase binary group-VA monolayers at the HSE06 level. The electron and hole effective masses of bismuthides for different directions are labeled in red and blue, respectively. The effective masses are given in the unit of the free-electron mass  $m_0$ .

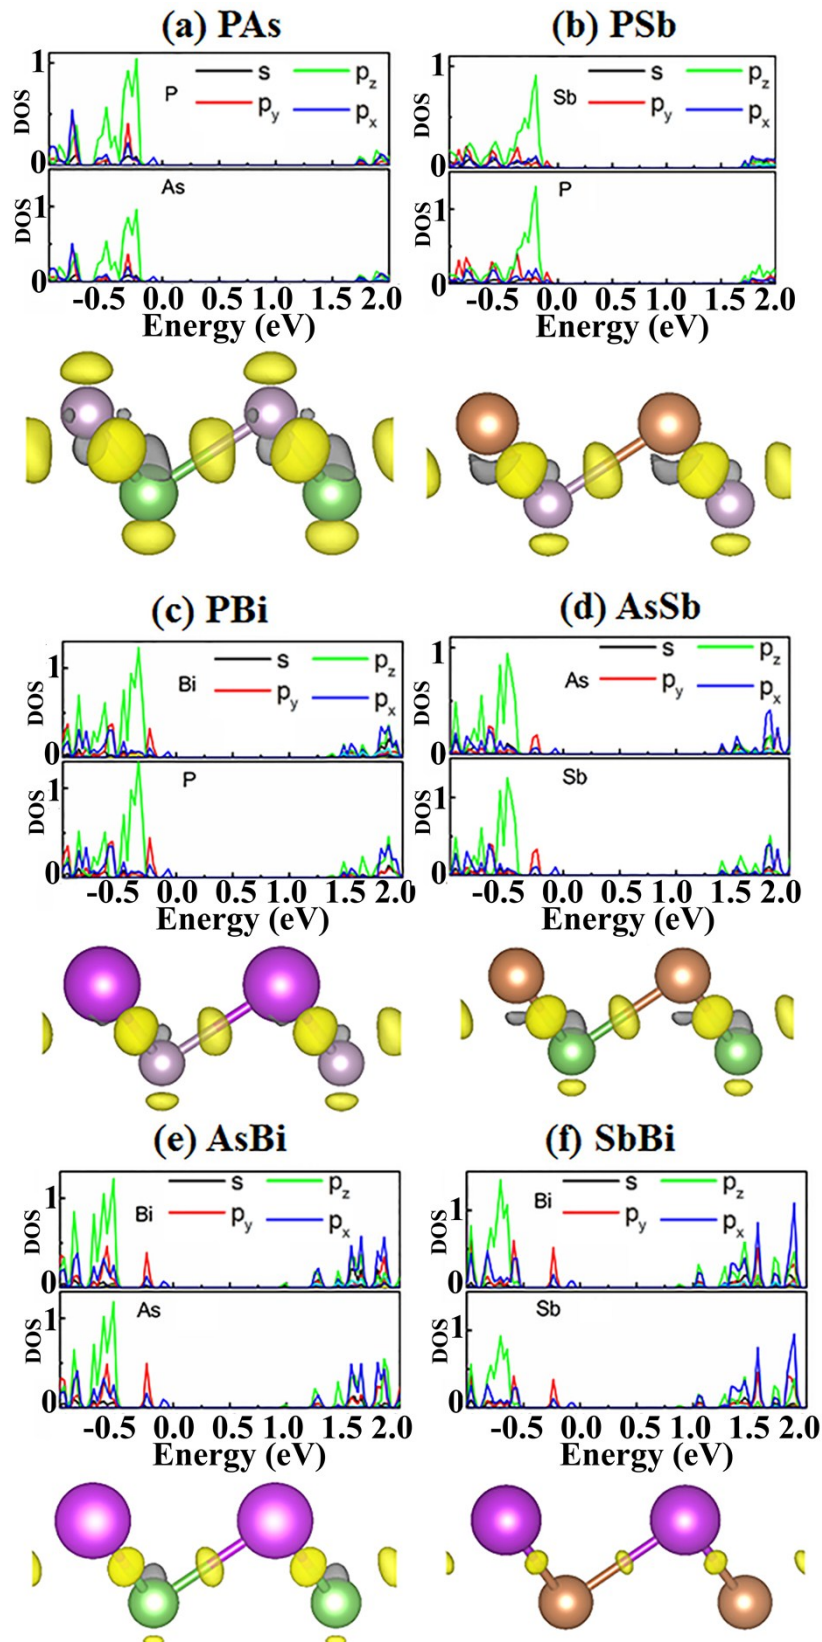

**Fig. S4** Projected density of states (DOS) and deformation charge density of 2D  $\beta$ -phase binary group-VA monolayers at the PBE level. Charge accumulation and depletion with respect to isolated atoms are also depicted in yellow and gray. The isosurface is at  $0.01 \text{ e}\text{\AA}^{-3}$ .

Table S1 effective mass  $m^*/m_0$ , DP constant  $E_1$  in eV, elastic constant  $C_{2D}$  in  $\text{Jm}^{-2}$ , and carrier

mobility  $\mu$  in  $\text{cm}^2\text{V}^{-1}\text{s}^{-1}$ , at 300 K for electrons (e) and holes (h) in 2D  $\beta$ -phase monolayer bismuthides. The results are calculated with the PBE functional.

| Materials |   | $m_x^*/m_0$ <sup>[a]</sup> | $m_y^*/m_0$ <sup>[a]</sup> | $E_{lx}$ | $E_{ly}$ | $C_{x/2D}$ | $C_{y/2D}$ | $\mu_x$ | $\mu_y$ |
|-----------|---|----------------------------|----------------------------|----------|----------|------------|------------|---------|---------|
| PBi       | e | 0.18                       | 0.16                       | 9.79     | 9.77     | 44.63      | 39.46      | 306.00  | 324.43  |
|           | h | 0.57                       | 0.60                       | 6.96     | 6.89     | 44.63      | 39.46      | 58.79   | 49.11   |
| AsBi      | e | 0.16                       | 0.13                       | 8.89     | 8.85     | 39.23      | 34.83      | 413.26  | 504.74  |
|           | h | 0.52                       | 0.56                       | 7.15     | 7.05     | 39.23      | 34.83      | 58.26   | 47.55   |
| SbBi      | e | 0.12                       | 0.14                       | 8.83     | 8.80     | 31.56      | 27.90      | 598.91  | 422.54  |
|           | h | 0.48                       | 0.45                       | 7.67     | 7.57     | 31.56      | 27.90      | 51.16   | 51.15   |

<sup>[a]</sup> $m_0$  is the mass of free electron

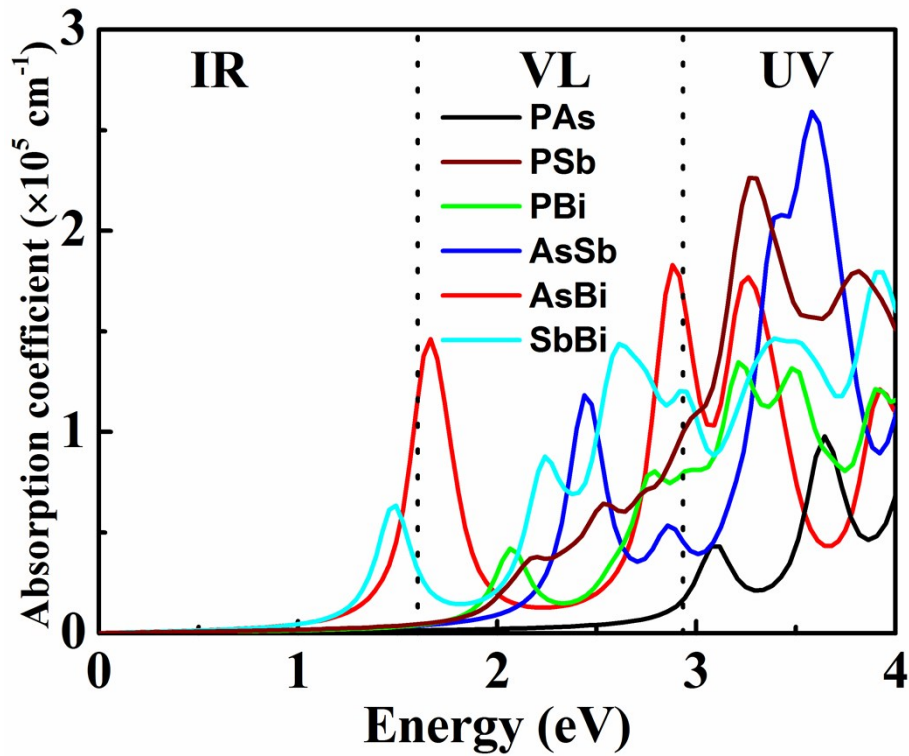

**Fig. S5** Calculated optical absorption spectra at the HSE06 level for 2D  $\beta$ -phase binary group-VA monolayers. The energy range for the IR (Infra-red), VL (visible light) and UV (ultraviolet) regions are represented by vertical lines.

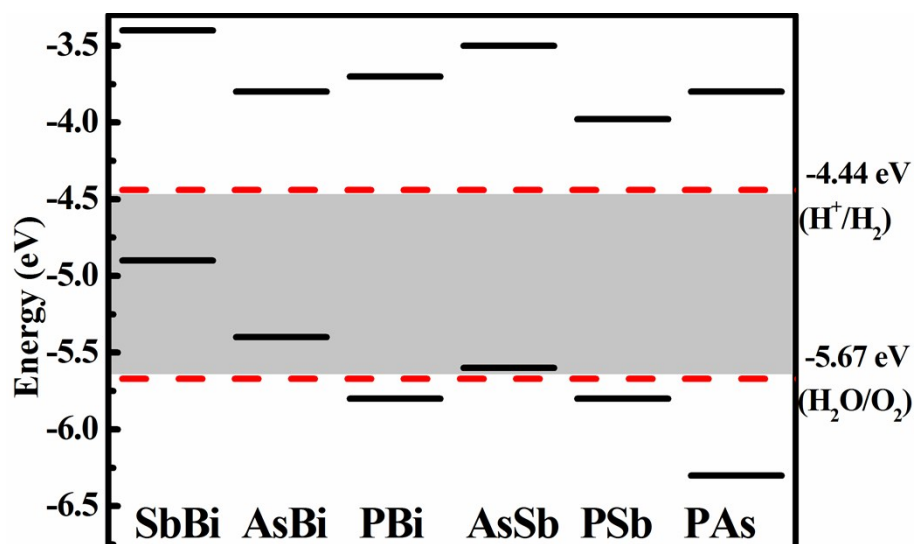

**Fig. S6** Band alignments of CBM (upper) and VBM (lower) for 2D  $\beta$ -phase binary group-VA monolayers with HSE06. The dotted lines indicate the water reduction ( $\text{H}^+/\text{H}_2$ ) and oxidation ( $\text{H}_2\text{O}/\text{O}_2$ ) potentials at  $\text{pH}=0$ .

**References:**

- 1 J. Y. Xi, T. Q. Zhao, D. Wang and Z. G. Shuai, *J. Phys. Chem. Lett.*, 2013, **5**, 285.
- 2 M. Q. Xie, S. L. Zhang, B. Cai, Z. Zhu, Y. S. Zou and H. B. Zeng, *Nanoscale*, 2016, **8**, 13407.
